# Supplementary material for: WFS1 gene delivery rescues visual function in a mouse model of Wolfram syndrome
Source: Research Square preprint supplement (doi:10.21203/rs.3.rs-7424550/v1), 2025-10-05
Supplement: Supplementary file 1 [file 5e36a2b8dece860ec816ff75.pdf]

A

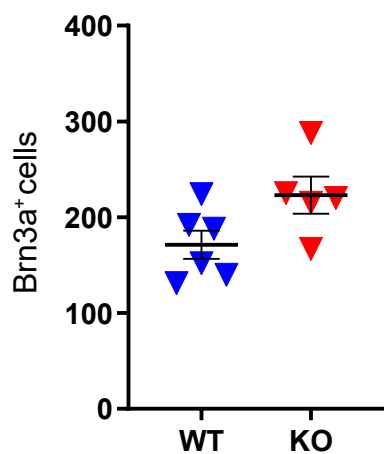

B

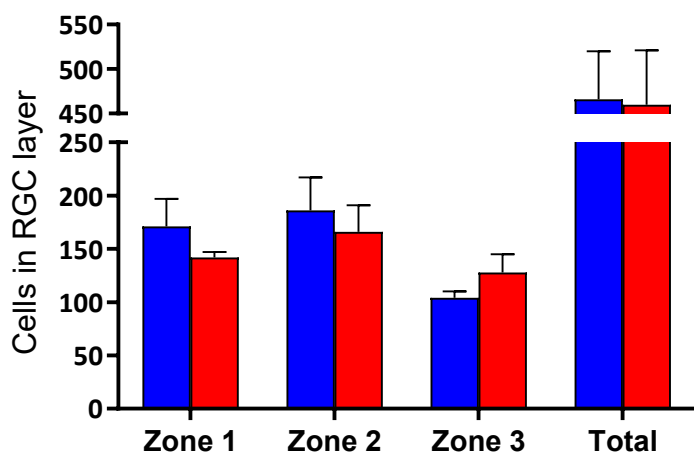

C

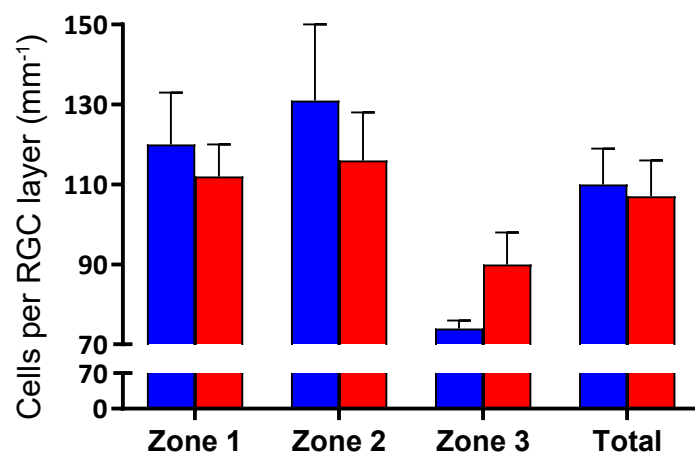

D

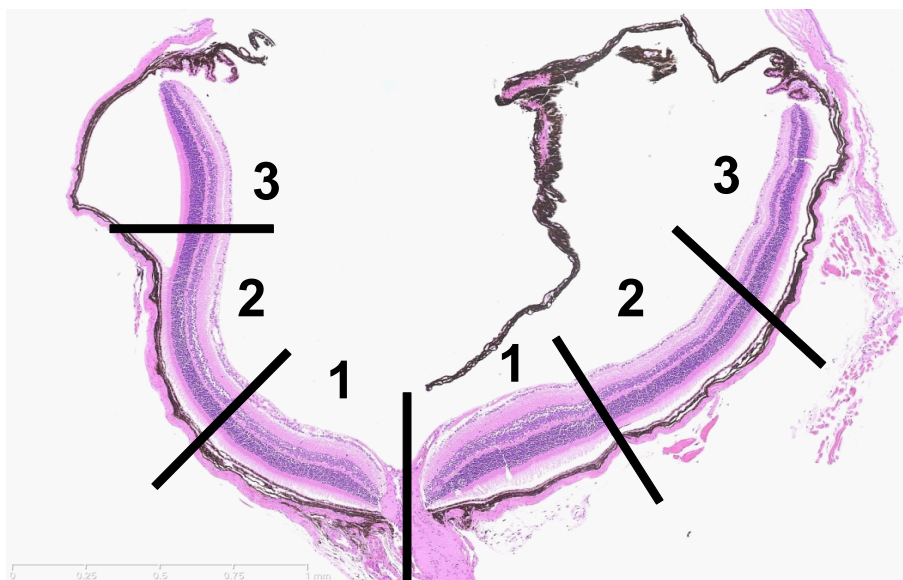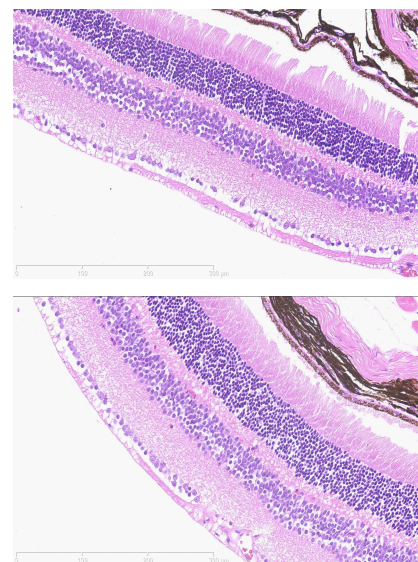

Supplementary Figure 4.

**RGC number in the retina.** Sagittal sections of the retina from WT (in blue) and KO (in red) mice at 7-month-old were analyzed for RGC number. Brn3a-positive cells in the entire immune-stained cryosection (A) were counted for  $n = 4-6$  mice, 6 sections each. Since not all RGCs express the Brn3a marker, counting based on H&E staining was performed as well (B) for abundance and (C) for density; 8 paraffin sections;  $n = 5-6$ . For further analysis, the retina was divided into 3 even zones (D): zone 1 as proximal to ON, zone 2 as middle, and zone 3 as distal. (E) Exemplary WT and KO zone 1. Results are shown as mean  $\pm$  SEM.
