# Supplementary material for: WFS1 gene delivery rescues visual function in a mouse model of Wolfram syndrome
Source: Research Square preprint supplement (doi:10.21203/rs.3.rs-7424550/v1), 2025-10-05
Supplement: Supplementary file 2 [file 819b0250384ffb1e5fc230b3.pdf]

**A**

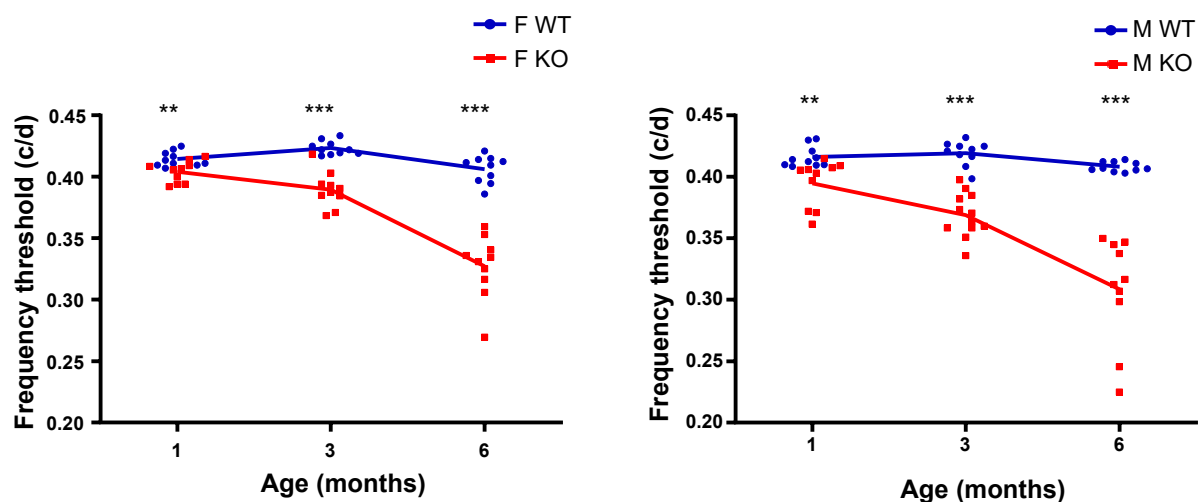

**B**

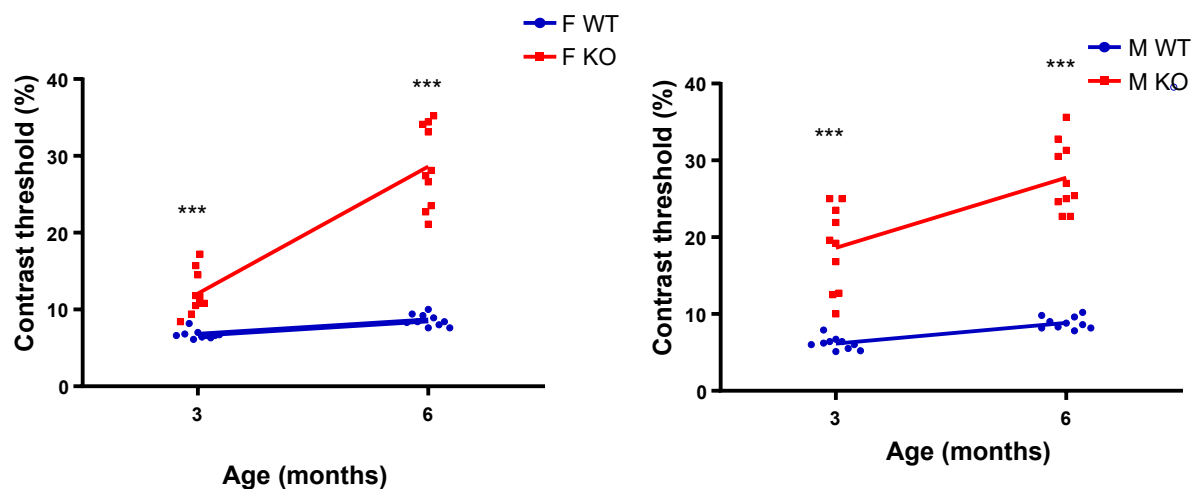

Supplementary Figure 1.

**Optomotor reflex in females and males of *Wfs1* WT and KO mice.** OMR was measured separately for females (top) and males (bottom) in photopic conditions at 1, 3 and 6-month-old, as a response to grating in horizontal motion at 2 rpm. (A) Spatial frequency thresholds were measured with 100% contrast for visual acuity. (B) Contrast thresholds were measured with constant 0.031 c/d frequency. Results for both eyes are shown as mean  $\pm$  SEM for WT (in blue) and KO (in red) mice;  $n = 10$ . Significance is indicated \*\*=  $p < 0.01$ , \*\*\*= $p < 0.001$ . The SEM bars are often too small to be visible. c/d: cycles per degree, F: female, M: male.
