# Supplementary material for: WFS1 gene delivery rescues visual function in a mouse model of Wolfram syndrome
Source: Research Square preprint supplement (doi:10.21203/rs.3.rs-7424550/v1), 2025-10-05
Supplement: Supplementary file 3 [file 95358b134727762bcb77faa9.pdf]

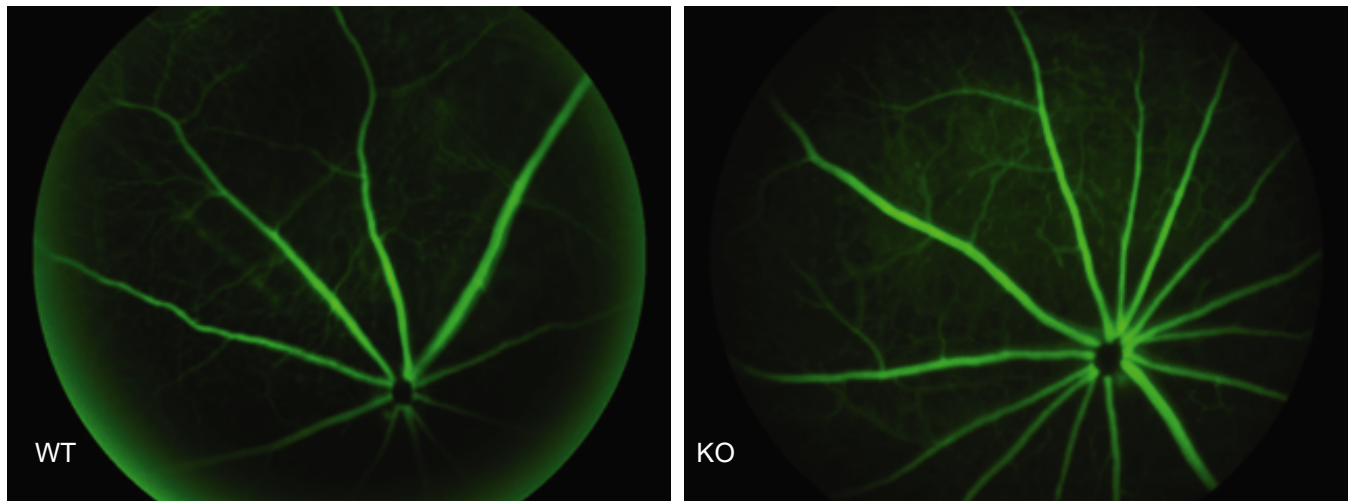

Supplementary Figure 2.

**Fluorescein angiography.** Eye fundus of 6-month-old WT (**A**) and KO (**B**) mice were examined for vascular leakage after injection of 0.5  $\mu$ l/g of 10% fluorescein sodium. There was no difference between the genotypes; blood vessels seemed intact.
