# Supplementary material for: WFS1 gene delivery rescues visual function in a mouse model of Wolfram syndrome
Source: Research Square preprint supplement (doi:10.21203/rs.3.rs-7424550/v1), 2025-10-05
Supplement: Supplementary file 4 [file b6bbc11ea2b01833c18d470d.pdf]

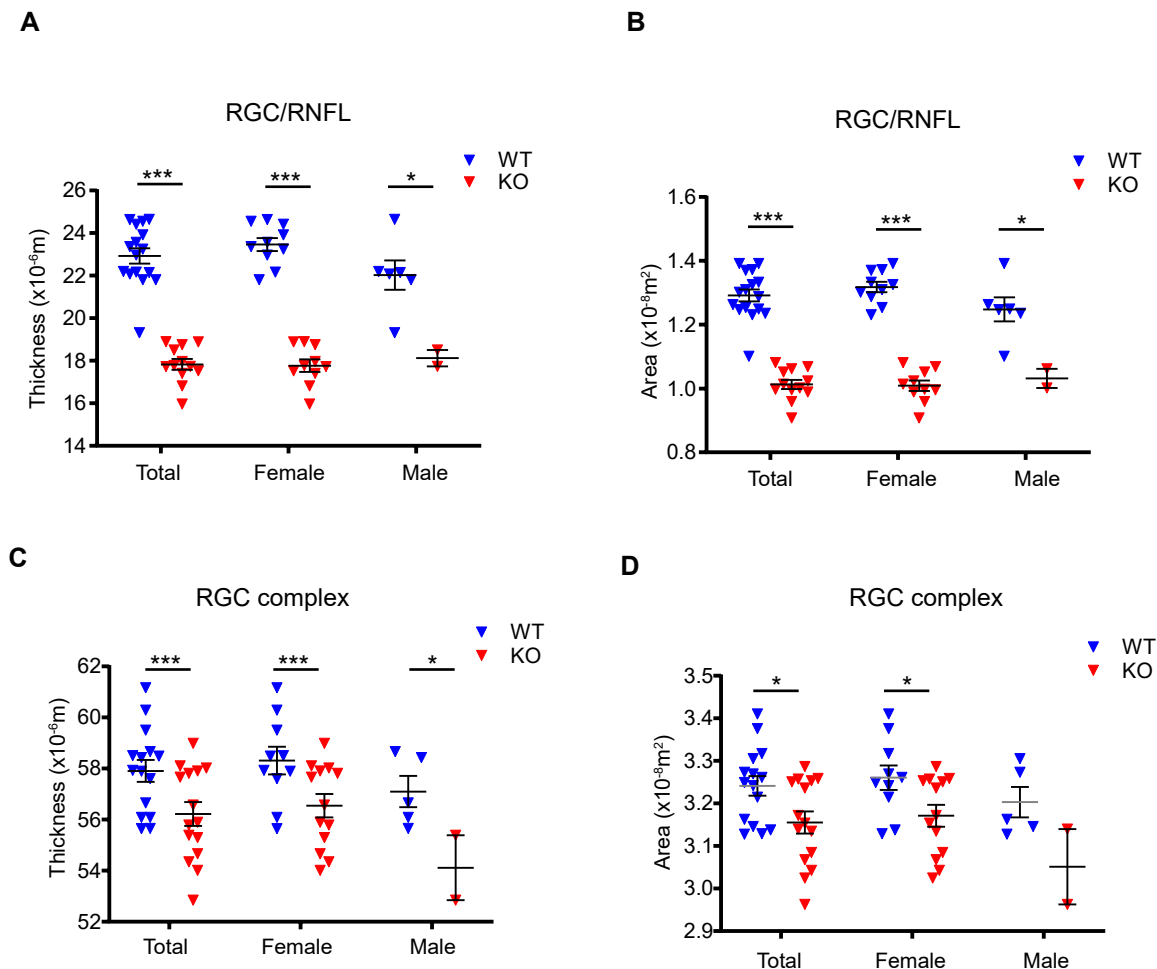

Supplementary Figure 3.

**Optic Coherence Tomography in females and males WT and KO Wfs1 mice.** (A) Thickness of RGC/RNFL layer. (B) Area of RGC/RNFL layer. (C) Thickness of RGC complex layer. (D) Area of RGC complex layer. Thickness and area were measured from OCT pictures, in 6.5-month-old WT (in blue) and KO (in red) mice. Results are shown as mean  $\pm$  SEM. Significance is indicated with  $\ast = p < 0.05$ ,  $\ast\ast\ast = p < 0.001$ . RGC: retinal ganglion cell, RNFL: retinal nerve fiber layer.
