# Supplementary material for: WFS1 gene delivery rescues visual function in a mouse model of Wolfram syndrome
Source: Research Square preprint supplement (doi:10.21203/rs.3.rs-7424550/v1), 2025-10-05
Supplement: Supplementary file 5 [file d08b08d406bafcf5fed77e08.pdf]

**A**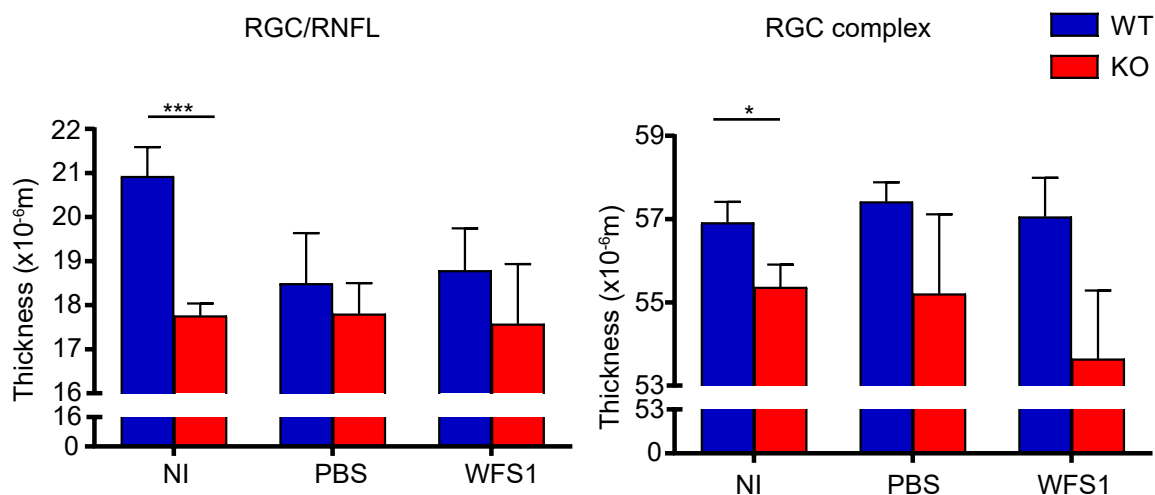**B**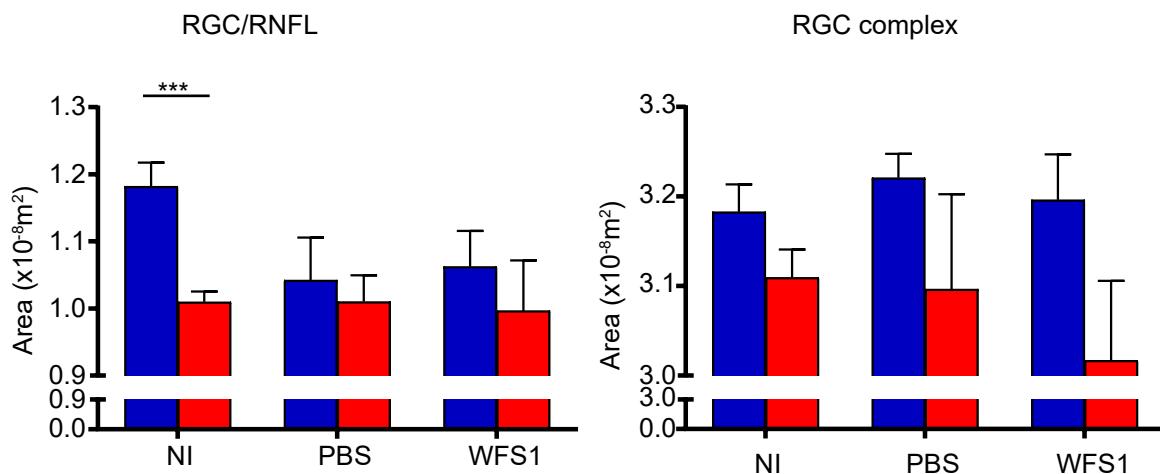

Supplementary Figure 6.

**Optic Coherence Tomography after WFS1 gene therapy.** (A) Thickness (top) and area (bottom) of RGC/RNFL layers measured from OCT scans, for 6.5-month-old WT (in blue) and KO (in red) mice. (B) RGC complex layers measured from OCT scans, for 6.5-month-old WT (in blue) and KO (in red) mice.  $n = 4-17$ . Results are shown as mean  $\pm$  SEM for both eyes; significance is indicated with \* when  $p < 0.05$ ; \*\*\* when  $p < 0.001$  NI – non-injected, PBS – treated with PBS, WFS1 – treated with AAV-2/2-CMV-WFS1.
