# Supplementary material for: WFS1 gene delivery rescues visual function in a mouse model of Wolfram syndrome
Source: Research Square preprint supplement (doi:10.21203/rs.3.rs-7424550/v1), 2025-10-05
Supplement: Supplementary file 6 [file fe5d513c060224eeb7b197a9.pdf]

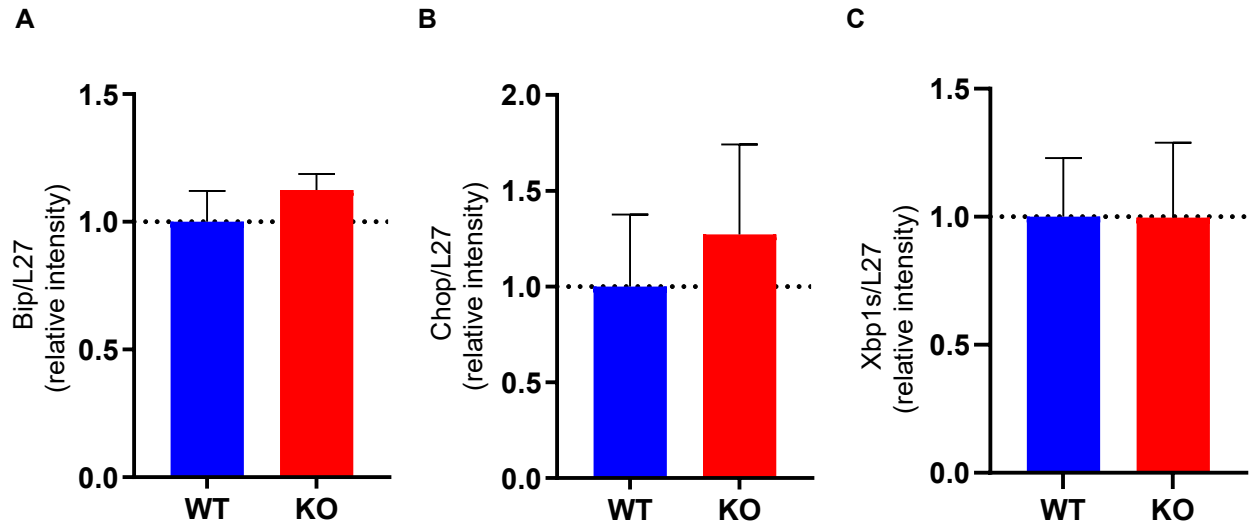

Supplementary Figure 5.

**No ER stress was observed in the retina of Wfs1 KO mice.** (A) Transcript level of Bip quantified by RT-qPCR in retina of 6.5 month old WT (in blue) and KO (in red) mice. (B) Transcript level of Chop quantified by RT-qPCR in retina of 6.5-month-old WT and KO mice. (C) Transcript level of Xbp1s quantified by RT-qPCR in retina of 6.5 month old WT and KO mice. The mRNA levels were normalized to the reference gene L27. n=4. Results are shown as mean  $\pm$  SEM.
